# Supplementary material for: Predictors of Mortality by Sex and Race in Heart Failure With Preserved Ejection Fraction: ARIC Community Surveillance Study
Source: PubMed Central journal article supplement — J Am Heart Assoc. 2020 Sep 14;9(19):e014669. doi: 10.1161/JAHA.119.014669 (PMC7792380; doi:10.1161/jaha.119.014669), 2020-09-14
Supplement: JAH3-9-e014669-s001.pdf [file JAH3-9-e014669-s001.pdf]

# **Supplemental Material**

**Table S1. Baseline characteristics by those who are excluded and included in study analysis.**

|                                             | Excluded<br>(unweighted N=3,355) |                                  | Included<br>(unweighted N=4,359) |                                  |
|---------------------------------------------|----------------------------------|----------------------------------|----------------------------------|----------------------------------|
|                                             | N                                | Weighted<br>N(%) or<br>mean (SD) | N                                | Weighted<br>N(%) or<br>mean (SD) |
| Age, years (mean)                           | 3355                             | 75.7 (10.9)                      | 4359                             | 75.9 (10.6)                      |
| Male, %                                     | 3355                             | 47.8                             | 4359                             | 46.8                             |
| African American, %                         | 3355                             | 32.9                             | 4359                             | 27.5                             |
| Admission to teaching hospital, %           | 3355                             | 39.4                             | 4359                             | 37.5                             |
| History of HF hospitalization, %            | 3355                             | 37.9                             | 4359                             | 32.4                             |
| Hypertension, %                             | 3353                             | 85.6                             | 4359                             | 85.5                             |
| Diabetes, %                                 | 3353                             | 49.6                             | 4359                             | 47.0                             |
| Atrial Fibrillation/flutter, %              | 3354                             | 36.9                             | 4359                             | 37.6                             |
| Coronary artery disease, %                  | 2377                             | 48.3                             | 4359                             | 52.8                             |
| Pulmonary hypertension, %                   | 3351                             | 17.0                             | 4359                             | 16.7                             |
| Sleep apnea, %                              | 3354                             | 12.1                             | 4358                             | 11.5                             |
| Chronic obstructive pulmonary<br>disease, % | 3355                             | 35.3                             | 4359                             | 35.1                             |
| End stage renal disease, %                  | 3354                             | 8.5                              | 4359                             | 5.9                              |
| Heart rate, bpm                             | 3266                             | 88.2 (22.9)                      | 4359                             | 89.4 (23.9)                      |
| Systolic blood pressure, mmHg               | 3257                             | 141.2 (33.8)                     | 4359                             | 142.9 (32.8)                     |
| BMI, kg/m <sup>2</sup>                      | 2146                             | 29.4 (9.7)                       | 4359                             | 29.4 (9.3)                       |
| Sodium (worst), mmol/L                      | 3291                             | 135.8 (5.1)                      | 4359                             | 135.9 (4.4)                      |
| eGFR (worst), mL/min/1.73 m <sup>2</sup>    | 2437                             | 38.5 (22.6)                      | 4359                             | 40.7 (22.8)                      |
| NT-proBNP (worst), pg/mL                    | 691                              | 13727.4<br>(28348.7)             | 657                              | 11743.4<br>(20084.2)             |
| Hemoglobin (last), g/dL                     | 3308                             | 11.2 (2.0)                       | 4335                             | 11.4 (1.9)                       |

**Table S2. Hazard Ratio of Each Predictor in Fully Adjusted Model\* of 365-day Mortality in HFpEF by Sex.**

|                                                             | 365-day mortality |                  |               |
|-------------------------------------------------------------|-------------------|------------------|---------------|
|                                                             | Female            | Male             | P interaction |
|                                                             | HR (95% CI)       | HR (95% CI)      |               |
| Age, per 10 years increment                                 | 1.33 (1.17-1.51)  | 1.23 (1.05-1.44) | 0.95          |
| African American                                            | 0.79 (0.60-1.03)  | 0.72 (0.52-1.01) | 0.99          |
| History of HF hospitalization                               | 0.96 (0.74-1.25)  | 0.91 (0.66-1.25) | 0.93          |
| Hypertension                                                | 0.84 (0.60-1.16)  | 0.91 (0.58-1.43) | 0.79          |
| Diabetes                                                    | 1.08 (0.85-1.38)  | 1.19 (0.88-1.61) | 0.85          |
| Atrial Fibrillation/flutter                                 | 1.29 (1.00-1.65)  | 1.11 (0.83-1.50) | 0.64          |
| Coronary artery disease                                     | 1.18 (0.92-1.51)  | 1.17 (0.87-1.56) | 0.70          |
| Pulmonary hypertension                                      | 1.13 (0.88-1.45)  | 1.69 (1.20-2.36) | 0.18          |
| Chronic obstructive pulmonary disease                       | 1.47 (1.17-1.83)  | 1.16 (0.85-1.56) | 0.41          |
| End stage renal disease                                     | 0.83 (0.46-1.49)  | 0.82 (0.48-1.39) | 0.84          |
| Heart rate, per 10 bpm increment                            | 1.05 (1.01-1.10)  | 1.10 (1.03-1.17) | 0.37          |
| Systolic blood pressure, per 10 mmHg increment              | 0.96 (0.93-1.00)  | 0.94 (0.89-0.99) | 0.41          |
| Sodium (worst), per 5 mmol/L increment                      | 0.95 (0.84-1.07)  | 0.91 (0.76-1.09) | 0.52          |
| eGFR (worst), per 15 mL/min/1.73 m <sup>2</sup> decrement** | 1.19 (1.08-1.31)  | 1.14 (1.01-1.27) | 0.66          |
| Body mass index, per 5 kg/m <sup>2</sup> increment          | 0.96 (0.90-1.02)  | 0.82 (0.73-0.93) | 0.06          |
| Hemoglobin, per 1 g/dL increment                            | 0.90 (0.83-0.97)  | 0.84 (0.77-0.92) | 0.28          |

\*Predictors in fully adjusted model: age, race, sex, history of HF, hypertension, diabetes, atrial fibrillation, coronary artery disease, pulmonary hypertension, chronic obstructive pulmonary disease, end-stage renal disease, heart rate, systolic blood pressure, serum sodium, eGFR, body mass index and hemoglobin.

\*\*eGFR = estimated glomerular filtration rate.

**Table S3. Hazard Ratio of Each Predictor in Fully Adjusted Model\* of 365-day Mortality in HFpEF by Race.**

|                                                             | 365-day mortality |                   |               |
|-------------------------------------------------------------|-------------------|-------------------|---------------|
|                                                             | Caucasian         | African American  | P interaction |
|                                                             | HR (95% CI)       | HR (95% CI)       |               |
| Age, per 10 years increment                                 | 1.28 (1.14, 1.44) | 1.32 (1.12, 1.55) | 0.36          |
| Male                                                        | 1.27 (1.03, 1.56) | 1.40 (0.99, 1.98) | 0.99          |
| History of HF hospitalization                               | 0.90 (0.71, 1.15) | 1.10 (0.78, 1.56) | 0.45          |
| Hypertension                                                | 0.87 (0.65, 1.17) | 0.59 (0.35, 0.98) | 0.13          |
| Diabetes                                                    | 1.18 (0.95, 1.47) | 0.93 (0.65, 1.33) | 0.42          |
| Atrial Fibrillation/flutter                                 | 1.34 (1.09, 1.66) | 0.87 (0.59, 1.29) | 0.31          |
| Coronary artery disease                                     | 1.18 (0.95, 1.46) | 1.14 (0.81, 1.60) | 0.38          |
| Pulmonary hypertension                                      | 1.19 (0.94, 1.51) | 1.56 (1.09, 2.22) | 0.28          |
| Chronic obstructive pulmonary disease                       | 1.41 (1.15, 1.72) | 1.28 (0.90, 1.80) | 0.98          |
| End stage renal disease                                     | 0.81 (0.48, 1.36) | 0.88 (0.53, 1.46) | 0.83          |
| Heart rate, per 10 bpm increment                            | 1.06 (1.02, 1.10) | 1.14 (1.06, 1.21) | 0.04          |
| Systolic blood pressure, per 10 mmHg increment              | 0.97 (0.94, 1.00) | 0.90 (0.85, 0.95) | 0.02          |
| Sodium (worst), per 5 mmol/L increment                      | 0.95 (0.85, 1.06) | 0.90 (0.73, 1.13) | 0.72          |
| eGFR (worst), per 15 mL/min/1.73 m <sup>2</sup> decrement** | 1.20 (1.10, 1.31) | 1.11 (0.99, 1.25) | 0.08          |
| Body mass index, per 5 kg/m <sup>2</sup> increment          | 0.88 (0.81, 0.95) | 1.03 (0.95, 1.12) | 0.01          |
| Hemoglobin, per 1 g/dL increment                            | 0.86 (0.81, 0.92) | 0.90 (0.81, 1.00) | 0.31          |

\*Predictors in fully adjusted model: age, race, sex, history of HF, hypertension, diabetes, atrial fibrillation, coronary artery disease, pulmonary hypertension, chronic obstructive pulmonary disease, end-stage renal disease, heart rate, systolic blood pressure, serum sodium, eGFR, body mass index and hemoglobin.

\*\*eGFR = estimated glomerular filtration rate; BMI = body mass index.
